# Supplementary material for: RAD-QTL Mapping Reveals Both Genome-Level Parallelism and Different Genetic Architecture Underlying the Evolution of Body Shape in Lake Whitefish (Coregonus clupeaformis) Species Pairs
Source: PubMed Central journal article supplement (PMC4502382; doi:10.1534/g3.115.019067), 2015-05-21
Supplement: supp_g3.115.019067_019067SI.pdf [file supp_g3.115.019067_019067SI.pdf]

**RAD-QTL mapping reveals both genome-level parallelism and different genetic architecture underlying the evolution of body shape in Lake Whitefish (*Coregonus clupeaformis*) species pairs**

Martin Laporte<sup>\*</sup>, Sean M. Rogers<sup>§</sup>, Anne-Marie Dion-Côté<sup>\*</sup>, Eric Normandeau<sup>\*</sup>, Pierre-Alexandre Gagnaire<sup>†</sup>, Anne C. Dalziel<sup>\*</sup>, Jobran Chebib<sup>§</sup>, Louis Bernatchez<sup>\*</sup>

<sup>\*</sup> Institut de Biologie Intégrative et des Systèmes (IBIS), Département de Biologie, Université Laval, Pavillon Charles-Eugène-Marchand, Québec, G1V 0A6, Canada

<sup>§</sup> Department of Biological Sciences, University of Calgary, 2500 University Drive N.W., Calgary, Alberta, T2N 1N4, Canada

<sup>†</sup> Institut des Sciences de l'Évolution – Montpellier (ISEM - CNRS UMR5554), SMEL, 2 rue des Chantiers, 34200 Sète, France

**Corresponding author:**

Martin Laporte

Institut de Biologie Intégrative et des Systèmes (IBIS), Département de Biologie, Université Laval, 1030 avenue de la Médecine, Québec, G1V 0A6, Québec, Canada.

Téléphone: (418) 656-2131 #8455

e-mail: uni.mlaporte@gmail.com

**DOI: 10.1534/g3.115.019067**

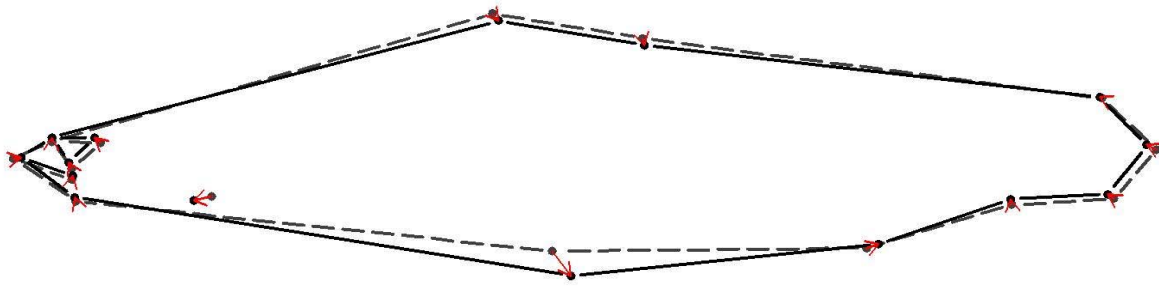

**Figure S1** Mean shape comparisons between males (dashed line) and females (solid line) in lab-raised Whitefish crosses. The red arrows show the direction of shape change from male to female. The difference between mean shapes of both treatments was multiplied by two for clarity.

**Table S1** Summary statistics for the 138 shape-associated QTL including linkage group (LG) and map position in cM, analyses in which the QTL was found (with sex as cofactor (cofactor), without or both), the detection threshold (Linkage group (LG) = 0.01; Genome-wide (GW) = 0.05), LOD, P-value, percent variance explained (PVE), the shape coordinates and shape part affected and the associated SNP with distance from the QTL in cM (if any). The 1.5 LOD support is the interval, in cM, in which the LOD score is within 1.5 units of its maximum.

| #QTL | LG | Position (cM) | 1.5 LOD (cM) | PVE  | Threshold | LOD  | P-value | Shape coord | Nearest marker       | QTL distance |
|------|----|---------------|--------------|------|-----------|------|---------|-------------|----------------------|--------------|
| 1    | 1  | 16.0          | 14.3-16.9    | 2.99 | LG        | 4.73 | 0.007   | x8          | 19208                | 0.1          |
| 1    | 1  | 16.0          | 13.0-16.9    | 2.99 | GW        | 5.26 | <0.001  | x2          |                      |              |
| 2    | 1  | 20.0          | 19.2-21.9    | 3.58 | LG        | 4.98 | 0.001   | y12         | 46086 <sup>*ab</sup> | 0.2          |
| 3    | 1  | 32.1          | 31.5-33.3    | 4.80 | LG        | 4.36 | 0.007   | x10         | 21285                | 0.0          |
| 4    | 2  | 11.0          | 8.0-14.0     | 7.41 | LG        | 4.55 | 0.005   | y11         | 138429 <sup>a</sup>  | 0.6          |
| 5    | 2  | 12.6          | 11.0-15.5    | 2.79 | LG        | 4.01 | 0.01    | y15         | 6903                 | 0.0          |
| 6    | 2  | 26.0          | 20.4-32.0    | 4.22 | LG        | 4.50 | 0.004   | x6          | 27266                | 0.2          |
| 7    | 2  | 27.0          | 25.5-30.9    | 8.10 | GW        | 6.08 | 0.001   | y5          | 115021               | 0.0          |
|      | 2  | 27.0          | 25.5-30.9    | 9.64 | GW        | 5.69 | <0.001  | y6          |                      |              |
| 8    | 2  | 29.8          | 26.6-30.9    | 7.47 | LG        | 4.64 | 0.004   | x9          | 46661                | 0.0          |
| 9    | 2  | 33.1          | 31.0-34.3    | 9.49 | LG        | 4.64 | 0.002   | y7          | 39926                | 0.0          |
|      | 2  | 33.1          | 31.0-39.8    | 6.09 | LG        | 4.27 | 0.006   | y8          |                      |              |
| 10   | 2  | 35.7          | 32.9-36.3    | 1.75 | LG        | 4.67 | 0.009   | x13         | 99310 <sup>ab</sup>  | 0.0          |
| 11   | 2  | 36.3          | 34.0-38.0    | 6.65 | LG        | 5.03 | 0.003   | x8          | 90861                |              |
| 12   | 2  | 38.6          | 37.5-40.7    | 0.46 | LG        | 4.76 | 0.004   | y4          | 123465               | 0.0          |
| 13   | 3  | 2.0           | 0.0-10.0     | 1.08 | LG        | 4.77 | 0.002   | x8          | 81054                | 1.2          |
| 14   | 3  | 6.4           | 0.0-7.9      | 0.59 | LG        | 4.16 | 0.01    | y12         | 87937                | 0.0          |
| 15   | 3  | 7.9           | 0.0-10.0     | 2.10 | LG        | 4.07 | 0.006   | x7          | 5096                 | 0.0          |
|      | 3  | 7.9           | 0.0-16.8     | 7.77 | LG        | 4.00 | 0.01    | x6          |                      |              |
| 16   | 3  | 9.1           | 7.0-11.0     | 1.12 | GW        | 7.11 | <0.001  | x11         | 114971               | 0.0          |
| 17   | 3  | 44.9          | 40.0-51.6    | 1.16 | LG        | 3.87 | 0.008   | x10         | 69007 <sup>b</sup>   | 0.0          |
| 18   | 4  | 26.0          | 15.0-35.7    | 1.28 | LG        | 5.17 | 0.009   | y3          | 33146 <sup>b</sup>   | 2.8          |
| 19   | 4  | 40.5          | 39.0-45.9    | 2.73 | LG        | 4.82 | 0.014   | x7          | 123418               | 0.0          |
| 20   | 4  | 64.5          | 63.6-66.0    | 5.84 | LG        | 4.99 | 0.003   | x2          | 20896                | 0.0          |
| 21   | 4  | 70.0          | 63.6-70.1    | 7.18 | GW        | 5.68 | 0.002   | x1          | 64346                | 0.0          |
| 22   | 4  | 70.7          | 70.0-72.5    | 1.41 | LG        | 4.63 | 0.008   | y15         | 114130 <sup>b</sup>  | 0.0          |
| 23   | 4  | 71.0          | 70.3-72.5    | 4.41 | LG        | 4.76 | 0.009   | y9          | 66793                | 0.1          |
| 24   | 4  | 79.7          | 78.7-80.3    | 5.42 | LG        | 4.82 | 0.008   | x14         | 88186                | 0.0          |

|    |    |       |             |       |    |      |        |     |                      |      |
|----|----|-------|-------------|-------|----|------|--------|-----|----------------------|------|
| 25 | 4  | 80.3  | 79.7-81.0   | 3.55  | GW | 5.61 | 0.003  | x10 | 78628 <sup>ab</sup>  | 0.0  |
| 26 | 4  | 92.2  | 90.1-92.9   | 3.93  | LG | 5.18 | 0.009  | y1  | 147541*              | 0.0  |
| 27 | 4  | 106.0 | 104.1-106.6 | 1.95  | GW | 5.75 | 0.001  | y2  | 125074               | 0.2  |
| 28 | 4  | 107.0 | 105.8-107.0 | 0.26  | GW | 5.55 | 0.003  | x9  | 267                  | 0.1  |
|    | 4  | 107.0 | 105.2-106.6 | 4.29  | GW | 5.73 | <0.001 | y10 |                      |      |
| 29 | 5  | 17.5  | 15.0-21.8   | 5.05  | LG | 4.98 | 0.006  | y3  | 51058 <sup>ab</sup>  | 0.0  |
| 30 | 5  | 49.6  | 45.4-50.9   | 7.68  | LG | 5.28 | 0.004  | x4  | 104425               | 0.0  |
| 31 | 5  | 50.0  | 48.0-51.2   | 9.49  | LG | 5.19 | 0.003  | x5  | 50194                | 0.2  |
| 32 | 5  | 51.7  | 48.8-55.2   | 8.88  | GW | 6.10 | <0.001 | x9  | 35273                | 0.0  |
| 33 | 5  | 52.2  | 51.2-54.0   | 4.03  | LG | 5.10 | 0.004  | x8  | 14817                | 0.0  |
| 34 | 5  | 68.2  | 68.1-70.4   | 1.71  | LG | 4.97 | 0.006  | y12 | 43047                | 0.0  |
| 35 | 6  | 16.0  | 15.2-16.3   | 7.54  | GW | 5.30 | <0.001 | y4  | 107600 <sup>ab</sup> | 0.0  |
|    | 6  | 16.0  | 13.5-16.2   | 2.23  | GW | 5.27 | <0.001 | y5  |                      |      |
|    | 6  | 16.0  | 15.2-16.2   | 11.87 | GW | 7.55 | <0.001 | y6  |                      |      |
| 36 | 7  | 8.8   | 8.3-8.9     | 4.50  | LG | 4.58 | 0.003  | x1  | 107557               | 0.00 |
|    | 7  | 8.8   | 8.3-8.9     | 7.23  | LG | 4.99 | 0.002  | x2  |                      |      |
| 37 | 7  | 18.0  | 16.1-19.9   | 2.12  | LG | 4.63 | 0.008  | x11 | 101290               | 0.0  |
| 38 | 8  | 10.0  | 0.0-15.0    | 0.45  | LG | 4.38 | 0.005  | x5  | 93783                | 0.5  |
| 39 | 8  | 10.8  | 0.0-14.0    | 2.21  | LG | 4.24 | 0.006  | y9  | 151762               | 0.0  |
| 40 | 8  | 58.4  | 57.3-60.4   | 14.72 | GW | 6.14 | 0.001  | x11 | 70187 <sup>a</sup>   | 0.0  |
| 41 | 9  | 60.0  | 57.0-63.0   | 10.46 | LG | 4.79 | 0.002  | y15 | 131325 <sup>ab</sup> | 0.22 |
|    | 9  | 61.0  | 57.0-63.8   | 3.85  | LG | 4.60 | 0.005  | y14 |                      | 0.78 |
|    | 9  | 61.0  | 57.8-65.0   | 1.80  | LG | 4.33 | 0.009  | y2  |                      | 0.78 |
| 42 | 9  | 83.9  | 74.0-86.0   | 1.47  | LG | 4.71 | 0.008  | y10 | 23705 <sup>b</sup>   | 0.0  |
|    | 9  | 83.9  | 82.0-87.0   | 5.82  | LG | 4.68 | 0.002  | y11 |                      |      |
| 43 | 10 | 36.4  | 35.2-37.9   | 5.11  | LG | 4.73 | 0.005  | y14 | 64568                | 0.0  |
| 44 | 10 | 37.0  | 35.9-39.3   | 1.43  | GW | 5.52 | 0.001  | y3  | 110970*              | 0.1  |
| 45 | 11 | 34.5  | 31.0-37.0   | 6.29  | LG | 4.32 | 0.003  | y13 | 152398               | 0.0  |
| 46 | 11 | 35.0  | 30.1-37.0   | 7.56  | LG | 4.56 | 0.002  | y9  | 46466                | 0.1  |
| 47 | 11 | 37.9  | 37.2-48.6   | 0.64  | LG | 4.73 | 0.004  | y12 | 42247 <sup>ab</sup>  | 0.0  |
| 48 | 11 | 60.7  | 59.0-64.0   | 8.41  | LG | 5.14 | 0.004  | x13 | 8080                 | 0.00 |
| 49 | 12 | 6.9   | 3.0-8.0     | 7.29  | LG | 4.95 | 0.004  | y10 | 155423 <sup>ab</sup> | 0.0  |
| 50 | 12 | 8.0   | 4.0-12.0    | 1.97  | LG | 4.37 | 0.006  | y7  | 23679                | 0.21 |
|    | 12 | 8.0   | 6.9-12.0    | 1.44  | GW | 5.63 | 0.002  | y8  |                      |      |
| 51 | 12 | 27.1  | 27.0-27.8   | 5.53  | GW | 5.55 | 0.001  | x1  | 132516*              | 0.0  |
| 52 | 12 | 38.2  | 30.5-38.8   | 1.18  | LG | 4.57 | 0.001  | x13 | 69063*               | 0.0  |
| 53 | 12 | 54.9  | 50.7-56.0   | 6.55  | LG | 4.38 | 0.009  | x3  | 893                  | 0.0  |
| 54 | 13 | 20.0  | 18.3-23.0   | 1.18  | LG | 4.40 | 0.008  | y4  | 126101               | 1.1  |
| 55 | 13 | 41.3  | 35.0-45.5   | 6.39  | LG | 5.05 | 0.004  | y13 | 120901               | 0.0  |
| 56 | 13 | 52.0  | 43.7-74.0   | 1.20  | LG | 4.52 | 0.005  | y1  | 38077                | 0.4  |
| 57 | 13 | 54.0  | 52.4-61.0   | 0.42  | GW | 6.31 | <0.001 | y2  | 64843                | 0.0  |
| 58 | 13 | 55.0  | 52.0-60.0   | 5.16  | GW | 7.34 | <0.001 | x4  | 146313 <sup>ab</sup> | 0.8  |

|           |    |      |           |       |    |      |        |     |                       |     |
|-----------|----|------|-----------|-------|----|------|--------|-----|-----------------------|-----|
|           | 13 | 55.8 | 52.0-59.0 | 4.92  | LG | 5.54 | <0.001 | x5  |                       | 0.0 |
| <b>59</b> | 13 | 73.0 | 60.0-87.6 | 2.12  | LG | 3.97 | 0.01   | x2  | 18689                 | 0.2 |
| <b>60</b> | 14 | 11.6 | 9.0-17.0  | 2.63  | LG | 3.91 | 0.008  | y2  | 19673                 | 0.0 |
| <b>61</b> | 14 | 18.2 | 14.7-19.6 | 1.81  | LG | 4.97 | 0.001  | x13 | 123800                | 0.0 |
| <b>62</b> | 15 | 29.9 | 24.2-32.7 | 2.37  | LG | 4.20 | 0.009  | y12 | 107006 <sup>ab</sup>  | 0.0 |
| <b>63</b> | 16 | 10.1 | 0.0-23.0  | 0.79  | LG | 4.86 | 0.001  | y13 | 89546                 | 0.0 |
| <b>64</b> | 16 | 42.0 | 36.0-44.0 | 1.10  | LG | 3.71 | 0.01   | x1  | 49883 <sup>ab</sup>   | 0.3 |
| <b>65</b> | 16 | 46.1 | 42.5-47.0 | 11.81 | LG | 4.24 | 0.003  | y7  | 3271 <sup>ab</sup>    | 0.0 |
|           | 16 | 46.1 | 43.0-47.5 | 10.97 | LG | 4.29 | 0.005  | y8  |                       |     |
|           | 16 | 46.1 | 44.1-47.5 | 4.96  | LG | 4.91 | 0.002  | y1  |                       |     |
| <b>66</b> | 16 | 58.8 | 54.0-64.0 | 1.92  | LG | 4.21 | 0.006  | x9  | 147458                | 0.0 |
| <b>67</b> | 16 | 60.4 | 56.8-66.8 | 2.04  | LG | 3.76 | 0.009  | x8  | 33001*                | 0.0 |
| <b>68</b> | 16 | 63.1 | 57.0-66.8 | 5.85  | LG | 3.84 | 0.01   | x7  | 132794                | 0.0 |
| <b>69</b> | 16 | 78.2 | 68.6-89.0 | 1.26  | LG | 3.90 | 0.004  | y12 | 100560 <sup>ab</sup>  | 0.0 |
| <b>70</b> | 17 | 37.8 | 34.8-42.7 | 8.01  | LG | 4.01 | 0.006  | x12 | 13798                 | 0.0 |
| <b>71</b> | 17 | 44.2 | 43.1-50.1 | 12.42 | LG | 4.99 | <0.001 | x13 | 145673 <sup>b</sup>   | 0.0 |
| <b>72</b> | 17 | 51.5 | 49.3-52.3 | 5.87  | LG | 4.21 | 0.005  | y15 | 123874 <sup>ab</sup>  | 0.0 |
|           | 17 | 51.5 | 48.0-52.3 | 4.76  | LG | 5.60 | 0.001  | y2  |                       |     |
| <b>73</b> | 17 | 51.7 | 48.0-52.9 | 2.59  | LG | 4.56 | 0.002  | y1  | 58078*                | 0.0 |
| <b>74</b> | 17 | 51.8 | 46.0-52.3 | 2.90  | LG | 5.13 | 0.002  | x4  | 74080 <sup>b</sup>    | 0.0 |
| <b>75</b> | 18 | 22.7 | 21.0-24.8 | 6.51  | GW | 7.54 | <0.001 | y3  | 41690                 | 0.0 |
|           | 18 | 23.0 | 18.0-29.0 | 4.72  | LG | 4.28 | 0.005  | y15 |                       | 0.3 |
| <b>76</b> | 19 | 19.0 | 14.0-26.0 | 2.22  | LG | 4.67 | 0.01   | y12 | 9185 <sup>b</sup>     | 0.9 |
| <b>77</b> | 19 | 22.0 | 21.2-24.9 | 7.43  | LG | 4.81 | 0.005  | x12 | 128619                | 0.0 |
| <b>78</b> | 19 | 29.7 | 27.0-31.9 | 3.52  | LG | 4.08 | 0.01   | x13 | 70939                 | 0.0 |
| <b>79</b> | 21 | 61.9 | 49.5-69.9 | 0.97  | LG | 4.01 | 0.009  | y4  | 136924                | 0.0 |
| <b>80</b> | 21 | 72.6 | 71.0-73.5 | 9.54  | LG | 5.88 | <0.001 | y8  | 127803 <sup>ab</sup>  | 0.0 |
| <b>81</b> | 21 | 77.8 | 75.0-82.2 | 3.90  | LG | 4.37 | 0.001  | x12 | 8717 <sup>ab</sup>    | 0.0 |
| <b>82</b> | 21 | 81.0 | 78.0-84.0 | 2.88  | GW | 5.67 | <0.001 | y12 | 107544* <sup>ab</sup> | 0.8 |
| <b>83</b> | 21 | 82.2 | 77.0-86.0 | 10.15 | GW | 5.90 | 0.002  | y10 | 37687*                | 0.0 |
| <b>84</b> | 23 | 2.6  | 2.0-4.0   | 6.38  | LG | 4.31 | 0.005  | x2  | 38781                 | 0.0 |
| <b>85</b> | 23 | 11.0 | 5.0-15.6  | 4.93  | LG | 3.74 | 0.009  | y5  | 29770                 | 1.9 |
| <b>86</b> | 23 | 30.0 | 26.6-32.8 | 2.40  | LG | 4.15 | 0.003  | y6  | 131558 <sup>a</sup>   | 0.2 |
| <b>87</b> | 24 | 54.5 | 53.3-58.5 | 1.12  | LG | 5.14 | 0.002  | x9  | 81546 <sup>ab</sup>   | 0.0 |
| <b>88</b> | 25 | 26.0 | 18.2-30.7 | 14.59 | LG | 4.94 | 0.002  | x7  | 33027                 | 0.6 |
| <b>89</b> | 25 | 29.1 | 28.2-30.0 | 3.77  | LG | 4.76 | 0.005  | x3  | 1790*                 | 0.0 |
| <b>90</b> | 26 | 6.0  | 0.0-10.0  | 2.89  | LG | 3.99 | 0.009  | y6  | 20067                 | 1.2 |
| <b>91</b> | 26 | 36.7 | 36.5-37.9 | 2.43  | GW | 5.40 | <0.001 | x15 | 35278*                | 0.0 |
| <b>92</b> | 26 | 80.0 | 66.0-81.0 | 1.48  | LG | 4.74 | 0.007  | y12 | 65665 <sup>ab</sup>   | 0.9 |
| <b>93</b> | 27 | 0.0  | 0.0-15.0  | 4.32  | LG | 4.55 | 0.004  | y1  | 73904                 | 0.0 |
| <b>94</b> | 27 | 38.9 | 35.6-41.4 | 11.00 | GW | 5.28 | 0.002  | x3  | 80526                 | 0.0 |

|     |    |      |            |       |    |      |        |     |                      |     |
|-----|----|------|------------|-------|----|------|--------|-----|----------------------|-----|
| 95  | 27 | 64.6 | 60.0-64.6  | 4.37  | GW | 5.90 | <0.001 | y10 | 48708                | 0.3 |
|     | 27 | 64.6 | 58.0-64.6  | 5.08  | LG | 4.62 | 0.002  | y11 |                      |     |
| 96  | 28 | 38.0 | 33.0-43.0  | 4.73  | GW | 5.93 | <0.001 | y2  | 88462*               | 0.3 |
|     | 28 | 38.3 | 32.0-42.3  | 3.33  | LG | 4.23 | 0.004  | y7  |                      |     |
|     | 28 | 38.3 | 36.3-39.6  | 3.84  | LG | 4.33 | 0.003  | y8  |                      |     |
|     | 28 | 38.3 | 33.2-39.6  | 1.80  | GW | 6.06 | <0.001 | y1  |                      |     |
| 97  | 29 | 9.0  | 8.0-13.0   | 1.81  | GW | 5.35 | 0.002  | x14 | 12305                | 0.1 |
|     | 29 | 9.1  | 8.00-14.00 | 1.46  | LG | 3.98 | 0.009  | x15 |                      |     |
|     | 29 | 11.0 | 8.0-16.0   | 7.16  | LG | 4.47 | 0.006  | y9  |                      |     |
| 98  | 29 | 17.5 | 16.1-18.1  | 6.12  | LG | 4.30 | 0.004  | x3  | 66525                | 0.0 |
| 99  | 29 | 29.0 | 27.0-30.5  | 5.16  | LG | 5.02 | 0.001  | x9  | 109751               | 0.1 |
| 100 | 29 | 44.0 | 41.2-46.0  | 9.04  | LG | 4.81 | 0.004  | y6  | 41781 <sup>ab</sup>  | 0.2 |
| 101 | 29 | 54.3 | 49.2-56.0  | 3.04  | LG | 4.15 | 0.006  | x4  | 27081                | 0.0 |
| 102 | 31 | 10.8 | 9.0-16.9   | 2.30  | LG | 4.48 | 0.005  | x7  | 101670               | 0.0 |
|     |    |      |            |       |    |      |        |     | *0.0                 |     |
| 103 | 31 | 12.2 | 10.0-13.3  | 7.77  | LG | 4.54 | 0.01   | x14 | 147625               | 0.0 |
|     | 31 | 12.2 | 9.3-16.9   | 8.76  | GW | 5.66 | <0.001 | x5  |                      |     |
| 104 | 31 | 14.9 | 9.3-16.2   | 11.19 | LG | 4.42 | 0.005  | x6  | 3771 <sup>*ab</sup>  | 0.0 |
| 105 | 31 | 16.2 | 11.0-23.0  | 14.35 | LG | 4.89 | 0.002  | y6  | 27954                |     |
| 106 | 31 | 69.0 | 65.6-70.6  | 7.36  | LG | 4.54 | 0.007  | y3  | 69815 <sup>a</sup>   | 0.1 |
|     | 31 | 69.1 | 68.1-71.9  | 12.37 | LG | 5.13 | 0.002  | y14 |                      |     |
| 107 | 32 | 24.4 | 21.0-27.7  | 6.29  | LG | 3.93 | 0.005  | x4  | 125971 <sup>ab</sup> | 0.0 |
|     | 32 | 24.4 | 21.0-31.00 | 2.51  | LG | 3.78 | 0.01   | x5  |                      |     |
| 108 | 32 | 30.0 | 27.0-34.9  | 4.60  | LG | 4.68 | 0.004  | x11 | 97205                | 0.0 |
|     | 32 | 30.0 | 29.2-34.0  | 9.30  | LG | 4.41 | 0.006  | x12 |                      |     |
|     | 32 | 30.0 | 27.0-31.0  | 1.54  | LG | 4.06 | 0.009  | y12 |                      |     |
| 109 | 33 | 47.0 | 44.3-63.0  | 2.67  | LG | 4.28 | 0.009  | x2  | 153833 <sup>ab</sup> | 0.8 |
| 110 | 34 | 6.9  | 6.0-11.4   | 10.18 | LG | 4.13 | <0.001 | x1  | 11005                | 0.0 |
| 111 | 34 | 11.7 | 10.2-13.1  | 7.75  | LG | 3.81 | 0.008  | y13 | 155701 <sup>ab</sup> | 0.0 |
| 112 | 34 | 21.9 | 20.0-22.4  | 3.23  | LG | 4.30 | 0.006  | x15 | 66224                | 0.0 |
| 113 | 34 | 30.0 | 27.3-40.0  | 8.09  | LG | 4.27 | 0.005  | y7  | 81895                | 0.0 |
|     | 34 | 30.0 | 27.7-73.6  | 5.37  | LG | 4.32 | 0.002  | y8  |                      |     |
| 114 | 34 | 36.2 | 33.0-73.6  | 0.47  | LG | 4.43 | 0.006  | y2  | 74955*               | 0.0 |
| 115 | 34 | 41.3 | 34.3-73.6  | 1.34  | LG | 4.15 | 0.006  | y1  | 103362               | 0.0 |
| 116 | 35 | 43.8 | 42.0-44.8  | 0.98  | LG | 4.76 | 0.001  | y13 | 31050 <sup>ab</sup>  | 0.0 |
| 117 | 36 | 6.2  | 2.0-6.9    | 0.51  | LG | 3.87 | 0.008  | y15 | 64089                | 0.0 |
| 118 | 36 | 10.0 | 0.0-14.0   | 3.18  | LG | 4.08 | 0.004  | x14 | 78917                | 1.3 |
| 119 | 36 | 15.4 | 13.0-19.0  | 6.57  | LG | 3.96 | 0.006  | y1  | 9528                 | 0.0 |
|     | 36 | 15.4 | 13.0-17.0  | 2.36  | LG | 3.96 | 0.009  | y2  |                      |     |
| 120 | 36 | 18.9 | 18.1-19.4  | 1.25  | LG | 4.18 | 0.008  | x9  | 45298*               | 0.0 |
| 121 | 36 | 23.5 | 21.9-25.0  | 8.32  | LG | 4.50 | 0.006  | x3  | 114899 <sup>b</sup>  | 0.0 |
| 122 | 36 | 31.4 | 30.5-42.6  | 5.29  | LG | 4.25 | 0.003  | x7  | 60769 <sup>a</sup>   | 0.0 |

|            |    |      |           |       |    |      |        |     |                     |     |
|------------|----|------|-----------|-------|----|------|--------|-----|---------------------|-----|
| <b>123</b> | 37 | 46.9 | 29.4-50.5 | 1.45  | LG | 4.22 | 0.01   | x9  | 60023               | 0.0 |
| <b>124</b> | 37 | 56.0 | 52.4-64.0 | 1.08  | LG | 4.34 | 0.007  | x5  | 136870              | 0.7 |
| <b>125</b> | 37 | 75.3 | 58.1-75.3 | 2.37  | LG | 5.05 | <0.001 | y1  | 28863               | 0.0 |
| <b>126</b> | 38 | 1.0  | 0.0-18.9  | 2.36  | LG | 3.98 | 0.005  | y5  | 138235              | 1.0 |
| <b>127</b> | 38 | 24.9 | 18.8-31.5 | 14.34 | LG | 4.24 | 0.002  | x7  | 8546 <sup>ab</sup>  | 0.0 |
| <b>128</b> | 38 | 30.4 | 27.9-32.0 | 16.43 | GW | 5.69 | <0.001 | x10 | 102431 <sup>b</sup> | 0.0 |
| <b>129</b> | 38 | 42.2 | 37.2-46.0 | 9.56  | GW | 5.46 | <0.001 | y3  | 21462               | 0.0 |
|            | 38 | 42.2 | 41.4-44.0 | 13.03 | GW | 5.68 | <0.001 | y4  |                     |     |
| <b>130</b> | 39 | 2.0  | 0.0-5.8   | 1.55  | LG | 4.35 | 0.005  | x3  | 6501                | 1.5 |
| <b>131</b> | 39 | 9.2  | 5.0-9.7   | 0.98  | LG | 5.15 | 0.001  | x8  | 28896 <sup>ab</sup> | 0.0 |
| <b>132</b> | 39 | 14.0 | 12.1-15.7 | 4.25  | LG | 5.23 | 0.001  | x5  | 67121 <sup>ab</sup> | 0.0 |
| <b>133</b> | 39 | 14.4 | 12.1-15.7 | 0.92  | LG | 4.43 | 0.007  | x7  | 60846 <sup>a</sup>  | 0.0 |
|            | 39 | 14.4 | 12.1-18.0 | 4.13  | LG | 3.76 | 0.009  | x6  |                     |     |
| <b>134</b> | 39 | 15.0 | 11.2-15.7 | 2.15  | LG | 4.63 | 0.004  | x4  | 99974 <sup>b</sup>  | 0.0 |
| <b>135</b> | 39 | 18.8 | 17.0-23.9 | 1.49  | LG | 3.69 | 0.008  | x13 | 86377 <sup>#</sup>  | 0.0 |
| <b>136</b> | 39 | 21.9 | 21.1-22.6 | 0.35  | LG | 4.41 | 0.006  | x9  | 71661 <sup>*</sup>  | 0.0 |
| <b>137</b> | 39 | 26.7 | 23.4-30.0 | 1.13  | LG | 3.98 | 0.007  | y15 | 11245               | 0.0 |
| <b>138</b> | 40 | 11.0 | 2.0-14.6  | 2.15  | LG | 4.66 | 0.002  | x1  | 98245               | 2.1 |

\* The 19 associated SNP that were found to be potentially under divergent selection in at least one lake

# The 13 associated SNP with annotation

<sup>a</sup> The 33 associated SNP that were found to be important markers with RandomForest ran on all five lakes

<sup>b</sup> The 38 associated SNP that were found to be important markers with random forest ran on Cliff, Indian and Webster lakes only.

**Table S2** Gene annotations and biological process for QTL associated SNPs, including scaffold genome number (Table S3) with its start hit and end (Pavey *et al.* unpubl. data; Table S3), bit score, blast hit scaffold region and blast hit e-value.

| SNP    | Scaffold | hit start | hit end | Bit score | Blast hit region           | Blast hit                            | e-value  | Annotation                                                       | Biol.process                              |
|--------|----------|-----------|---------|-----------|----------------------------|--------------------------------------|----------|------------------------------------------------------------------|-------------------------------------------|
| 3771*  | 53738    | 723       | 655     | 91.6      | scaffold-53738_10145-13664 | gi 166218146 sp A0MSJ1.1 CRA1B_DANRE | 2.00E-21 | Collagen alpha-1(XXVII) chain B                                  | Skeletal system development               |
| 6501   | 18019    | 18515     | 18582   | 121       | scaffold-18019_12691-13429 | gi 74710067 sp Q6R2W3.1 SCND3_HUMAN  | 7.00E-20 | SCAN domain-containing protein 3                                 | Unknown                                   |
| 13798  | 436174   | 7187      | 7120    | 121       | scaffold-436174_513-2580   | gi 122145283 sp Q0IID7.1 DUS10_BOVIN | 2.00E-47 | Dual specificity protein phosphatase 10                          | Cellular signalling                       |
| 19208  | 447255   | 1037      | 1104    | 126       | scaffold-447255_500-863    | gi 123885751 sp QQP427.1 PPR35_DANRE | 6.00E-14 | Protein phosphatase 1 regulatory subunit 35                      | Cellular signalling                       |
| 21462  | 183364   | 2807      | 2758    | 87.9      | scaffold-183364_3863-4414  | gi 464864 sp P35072.1 TCB1_CAEBR     | 9.00E-36 | Transposable element Tcb1 transposase                            | Transposable element                      |
| 28896  | 232830   | 3491      | 3424    | 104       | scaffold-232830_2720-3610  | gi 74821373 sp Q95SX7.1 RTBS_DROME   | 3.00E-17 | Probable RNA-directed DNA polymerase from transposon BS          | RNA-dependant DNA replication             |
| 37687* | 26906    | 1078      | 1040    | 67.6      | scaffold-26906_1850-4864   | gi 141446 sp P03934.1 TC1A_CAEL      | 2.00E-36 | Transposable element Tc1 transposase                             | Transposable element                      |
| 38077  | 208871   | 9749      | 9682    | 126       | scaffold-208871_1928-3130  | gi 172046699 sp Q86TG7.2 PEG10_HUMAN | 6.00E-43 | Retrotransposon-derived protein PEG10                            | Apoptosis and cell differentiation        |
| 38781  | 133600   | 2165      | 2232    | 121       | scaffold-133600_588-6816   | gi 143018392 sp Q9HCG7.2 GBA2_HUMAN  | 1.00E-20 | Non-lysosomal glucosylceramidase                                 | Neuronal development                      |
| 48708  | 453732   | 5661      | 5728    | 121       | scaffold-453732_3049-4594  | gi 51702142 sp Q9D2M8.4 UB2V2_MOUSE  | 8.00E-24 | Ubiquitin-conjugating enzyme E2 variant 2                        | Transcriptional regulation and DNA repair |
|        |          |           |         |           | scaffold-453732_6190-6527  | gi 464864 sp P35072.1 TCB1_CAEBR     | 4.00E-31 | Transposable element Tcb1 transposase                            | Transposable element                      |
| 49883  | 279183   | 2986      | 3053    | 126       | scaffold-279183_1927-2442  | gi 68565602 sp Q92585.3 MAML1_HUMAN  | 2.00E-13 | Mastermind-like protein 1                                        | Notch signaling pathway                   |
| 51058  | 310208   | 183       | 116     | 126       | scaffold-310208_102-461    | gi 385178693 sp F1Q7Z7.2 DAAF3_DANRE | 3.00E-24 | Dynein assembly factor 3, axonemal                               | Cytoplasm                                 |
| 60023  | 7589     | 4537      | 4604    | 121       | scaffold-7589_379-636      | gi 75041428 sp Q5R7K9.1 EDIL3_PONAB  | 2.00E-35 | EGF-like repeat and discoidin I-like domain-containing protein 3 | Cell adhesion                             |
| 64568  | 15526    | 9006      | 9073    | 121       | scaffold-15526_1724-2397   | gi 464864 sp P35072.1 TCB1_CAEBR     | 2.00E-19 | Transposable element Tcb1 transposase                            | Transposable element                      |
|        |          |           |         |           | scaffold-15526_6444-9312   | gi 122069920 sp Q2KJB1.1 SEP10_BOVIN | 3.00E-69 | Septin-10                                                        | Cell cycle                                |



|         |        |       |       |      |                            |                                      |           |                                                            |                               |
|---------|--------|-------|-------|------|----------------------------|--------------------------------------|-----------|------------------------------------------------------------|-------------------------------|
| 69063*  | 54791  | 5526  | 5459  | 121  | scaffold-54791_3224-3664   | gi 81880352 sp Q9CPY0.1 MRM2_MOUSE   | 2.00E-47  | rRNA methyltransferase 2, mitochondrial                    | rRNA methylation              |
| 74955*  | 76647  | 1518  | 1452  | 124  | scaffold-76647_2170-5490   | gi 83288218 sp Q53GS7.2 GLE1_HUMAN   | 3.00E-36  | Nucleoporin GLE1                                           | mRNA export                   |
|         |        |       |       |      | scaffold-76647_6723-7102   | gi 464865 sp Q04202.1 TCB2_CAEBR     | 6.00E-20  | Transposable element Tcb2 transposase                      | Transposable element          |
| 78628*  | 78598  | 5211  | 5144  | 126  | scaffold-78598_2145-2291   | gi 9910620 sp O43715.1 TRIA1_HUMAN   | 5.00E-26  | TP53-regulated inhibitor of apoptosis 1                    | Apoptosis                     |
| 78917   | 183364 | 2847  | 2914  | 102  | scaffold-183364_3863-4414  | gi 464864 sp P35072.1 TCB1_CAEBR     | 9.00E-36  | Transposable element Tcb1 transposase                      | Transposable element          |
| 80526   | 232830 | 3500  | 3567  | 126  | scaffold-232830_2720-3610  | gi 74821373 sp Q95SX7.1 RTBS_DROME   | 3.00E-17  | Probable RNA-directed DNA polymerase from transposon BS    | RNA-dependant DNA replication |
| 88186   | 336919 | 2690  | 2757  | 126  | scaffold-336919_2507-2698  | gi 81898999 sp Q8C627.1 F221B_MOUSE  | 5.00E-16  | Protein FAM221B                                            | <i>Unknown</i>                |
| 93783   | 334686 | 526   | 459   | 126  | scaffold-334686_207-1019   | gi 134035372 sp Q6A085.2 ZN629_MOUSE | 1.00E-30  | Zinc finger protein 629                                    | Transcriptional regulation    |
| 97205   | 34582  | 2640  | 2706  | 124  | scaffold-34582_9401-10219  | gi 464864 sp P35072.1 TCB1_CAEBR     | 3.00E-37  | Transposable element Tcb1 transposase                      | Transposable element          |
|         |        |       |       |      | scaffold-34582_17105-17316 | gi 50403735 sp P33005.2 KALM_CHICK   | 2.00E-29  | Anosmin-1                                                  | Cell adhesion                 |
| 101670* | 183364 | 2838  | 2766  | 97.1 | scaffold-183364_3863-4414  | gi 464864 sp P35072.1 TCB1_CAEBR     | 9.00E-36  | Transposable element Tcb1 transposase                      | Transposable element          |
| 110970* | 12855  | 20623 | 20586 | 71.3 | scaffold-12855_2228-14681  | gi 338817941 sp Q9QXZ0.2 MACF1_MOUSE | 1.00E-62  | Microtubule-actin cross-linking factor 1                   | <i>Multiple</i>               |
|         | 32096  | 8942  | 9009  | 121  | scaffold-32096_1541-5542   | gi 338817989 sp Q9UPN3.4 MACF1_HUMAN | 2.00E-103 | Microtubule-actin cross-linking factor 1, isoforms 1/2/3/5 | <i>Multiple</i>               |
| 114899  | 84221  | 5438  | 5371  | 126  | scaffold-78598_3908-8097   | gi 145566945 sp Q2NKQ1.2 SGSM1_HUMAN | 3.00E-63  | Small G protein signaling modulator 1                      | Golgi apparatus               |
|         |        |       |       |      | scaffold-84221_5333-6762   | gi 82100806 sp Q8AXC7.1 PGFRA_TAKRU  | 1.00E-92  | Platelet-derived growth factor receptor alpha              | Chemotaxis and development    |
| 114971  | 340942 | 1     | 61    | 113  | scaffold-340942_931-1155   | gi 123792664 sp Q0V8T9.1 CTP5A_MOUSE | 3.00E-21  | Contactin-associated protein like 5-1                      | Cell adhesion                 |
| 123874* | 228433 | 1365  | 1432  | 121  | scaffold-228433_10-3697    | gi 425906075 sp Q8NF91.4 SYNE1_HUMAN | 2.00E-22  | Nesprin-1                                                  | Cytoskeleton and organelle    |
| 131325  | 300418 | 2369  | 2302  | 126  | scaffold-300418_521-4385   | gi 17367145 sp Q9ULA0.1 DNPEP_HUMAN  | 6.00E-19  | Aspartyl aminopeptidase                                    | Protein metabolism            |
| 136924  | 64513  | 1788  | 1721  | 126  | scaffold-64513_1202-1897   | gi 75056157 sp Q9GLY5.1 ITIH3_RABIT  | 6.00E-37  | Inter-alpha-trypsin inhibitor heavy chain H3               | Hyaluronan metabolism         |

|         |        |      |      |     |                           |                                     |          |                                                         |                               |
|---------|--------|------|------|-----|---------------------------|-------------------------------------|----------|---------------------------------------------------------|-------------------------------|
|         | 272191 | 699  | 766  | 121 | scaffold-272191_683-862   | gi 3024056 sp Q63416.1 ITIH3_RAT    | 9.00E-17 | Inter-alpha-trypsin inhibitor heavy chain H3            | Hyaluronan metabolism         |
| 138429  | 232830 | 3491 | 3424 | 99  | scaffold-232830_2720-3610 | gi 74821373 sp Q95SX7.1 RTBS_DROME  | 3.00E-17 | Probable RNA-directed DNA polymerase from transposon BS | RNA-dependant DNA replication |
| 147541* | 392290 | 308  | 375  | 126 | scaffold-392290_2121-2231 | gi 75077434 sp Q4U0T9.1 CSRP3_BOVIN | 4.00E-18 | Cysteine and glycine-rich protein 3                     | Cardiac muscle development    |
| 155423  | 31593  | 2825 | 2892 | 121 | scaffold-31593_6120-6725  | gi 464864 sp P35072.1 TCB1_CAEBR    | 6.00E-36 | Transposable element Tcb1 transposase                   | Transposable element          |

\* Annotated SNP with potential divergent selection.

**Table S3** Sequence of the 30 genomes scaffolds from Pavey *et al.* (unpubl. data) that were used for annotation in this study.

Available for download at [www.g3journal.org/lookup/suppl/doi:10.1534/g3.115.019067/-/DC1](http://www.g3journal.org/lookup/suppl/doi:10.1534/g3.115.019067/-/DC1)
