# Supplementary material for: RAD-QTL Mapping Reveals Both Genome-Level Parallelism and Different Genetic Architecture Underlying the Evolution of Body Shape in Lake Whitefish (Coregonus clupeaformis) Species Pairs
Source: PubMed Central journal article supplement (PMC4502382; doi:10.1534/g3.115.019067), 2015-05-21
Supplement: supp_g3.115.019067_TableS1.pdf [file supp_g3.115.019067_TableS1.pdf]

**Table S1** Summary statistics for the 138 shape-associated QTL including linkage group (LG) and map position in cM, analyses in which the QTL was found (with sex as cofactor (cofactor), without or both), the detection threshold (Linkage group (LG) = 0.01; Genome-wide (GW) = 0.05), LOD, P-value, percent variance explained (PVE), the shape coordinates and shape part affected and the associated SNP with distance from the QTL in cM (if any). The 1.5 LOD support is the interval, in cM, in which the LOD score is within 1.5 units of its maximum.

| #QTL | LG | Position (cM) | 1.5 LOD (cM) | PVE  | Threshold | LOD  | P-value | Shape coord | Nearest marker       | QTL distance |
|------|----|---------------|--------------|------|-----------|------|---------|-------------|----------------------|--------------|
| 1    | 1  | 16.0          | 14.3-16.9    | 2.99 | LG        | 4.73 | 0.007   | x8          | 19208                | 0.1          |
| 1    | 1  | 16.0          | 13.0-16.9    | 2.99 | GW        | 5.26 | <0.001  | x2          |                      |              |
| 2    | 1  | 20.0          | 19.2-21.9    | 3.58 | LG        | 4.98 | 0.001   | y12         | 46086 <sup>*ab</sup> | 0.2          |
| 3    | 1  | 32.1          | 31.5-33.3    | 4.80 | LG        | 4.36 | 0.007   | x10         | 21285                | 0.0          |
| 4    | 2  | 11.0          | 8.0-14.0     | 7.41 | LG        | 4.55 | 0.005   | y11         | 138429 <sup>a</sup>  | 0.6          |
| 5    | 2  | 12.6          | 11.0-15.5    | 2.79 | LG        | 4.01 | 0.01    | y15         | 6903                 | 0.0          |
| 6    | 2  | 26.0          | 20.4-32.0    | 4.22 | LG        | 4.50 | 0.004   | x6          | 27266                | 0.2          |
| 7    | 2  | 27.0          | 25.5-30.9    | 8.10 | GW        | 6.08 | 0.001   | y5          | 115021               | 0.0          |
|      | 2  | 27.0          | 25.5-30.9    | 9.64 | GW        | 5.69 | <0.001  | y6          |                      |              |
| 8    | 2  | 29.8          | 26.6-30.9    | 7.47 | LG        | 4.64 | 0.004   | x9          | 46661                | 0.0          |
| 9    | 2  | 33.1          | 31.0-34.3    | 9.49 | LG        | 4.64 | 0.002   | y7          | 39926                | 0.0          |
|      | 2  | 33.1          | 31.0-39.8    | 6.09 | LG        | 4.27 | 0.006   | y8          |                      |              |
| 10   | 2  | 35.7          | 32.9-36.3    | 1.75 | LG        | 4.67 | 0.009   | x13         | 99310 <sup>ab</sup>  | 0.0          |
| 11   | 2  | 36.3          | 34.0-38.0    | 6.65 | LG        | 5.03 | 0.003   | x8          | 90861                |              |
| 12   | 2  | 38.6          | 37.5-40.7    | 0.46 | LG        | 4.76 | 0.004   | y4          | 123465               | 0.0          |
| 13   | 3  | 2.0           | 0.0-10.0     | 1.08 | LG        | 4.77 | 0.002   | x8          | 81054                | 1.2          |
| 14   | 3  | 6.4           | 0.0-7.9      | 0.59 | LG        | 4.16 | 0.01    | y12         | 87937                | 0.0          |
| 15   | 3  | 7.9           | 0.0-10.0     | 2.10 | LG        | 4.07 | 0.006   | x7          | 5096                 | 0.0          |
|      | 3  | 7.9           | 0.0-16.8     | 7.77 | LG        | 4.00 | 0.01    | x6          |                      |              |
| 16   | 3  | 9.1           | 7.0-11.0     | 1.12 | GW        | 7.11 | <0.001  | x11         | 114971               | 0.0          |
| 17   | 3  | 44.9          | 40.0-51.6    | 1.16 | LG        | 3.87 | 0.008   | x10         | 69007 <sup>b</sup>   | 0.0          |
| 18   | 4  | 26.0          | 15.0-35.7    | 1.28 | LG        | 5.17 | 0.009   | y3          | 33146 <sup>b</sup>   | 2.8          |
| 19   | 4  | 40.5          | 39.0-45.9    | 2.73 | LG        | 4.82 | 0.014   | x7          | 123418               | 0.0          |
| 20   | 4  | 64.5          | 63.6-66.0    | 5.84 | LG        | 4.99 | 0.003   | x2          | 20896                | 0.0          |
| 21   | 4  | 70.0          | 63.6-70.1    | 7.18 | GW        | 5.68 | 0.002   | x1          | 64346                | 0.0          |
| 22   | 4  | 70.7          | 70.0-72.5    | 1.41 | LG        | 4.63 | 0.008   | y15         | 114130 <sup>b</sup>  | 0.0          |
| 23   | 4  | 71.0          | 70.3-72.5    | 4.41 | LG        | 4.76 | 0.009   | y9          | 66793                | 0.1          |
| 24   | 4  | 79.7          | 78.7-80.3    | 5.42 | LG        | 4.82 | 0.008   | x14         | 88186                | 0.0          |

|    |    |       |             |       |    |      |        |     |                      |      |
|----|----|-------|-------------|-------|----|------|--------|-----|----------------------|------|
| 25 | 4  | 80.3  | 79.7-81.0   | 3.55  | GW | 5.61 | 0.003  | x10 | 78628 <sup>ab</sup>  | 0.0  |
| 26 | 4  | 92.2  | 90.1-92.9   | 3.93  | LG | 5.18 | 0.009  | y1  | 147541*              | 0.0  |
| 27 | 4  | 106.0 | 104.1-106.6 | 1.95  | GW | 5.75 | 0.001  | y2  | 125074               | 0.2  |
| 28 | 4  | 107.0 | 105.8-107.0 | 0.26  | GW | 5.55 | 0.003  | x9  | 267                  | 0.1  |
|    | 4  | 107.0 | 105.2-106.6 | 4.29  | GW | 5.73 | <0.001 | y10 |                      |      |
| 29 | 5  | 17.5  | 15.0-21.8   | 5.05  | LG | 4.98 | 0.006  | y3  | 51058 <sup>ab</sup>  | 0.0  |
| 30 | 5  | 49.6  | 45.4-50.9   | 7.68  | LG | 5.28 | 0.004  | x4  | 104425               | 0.0  |
| 31 | 5  | 50.0  | 48.0-51.2   | 9.49  | LG | 5.19 | 0.003  | x5  | 50194                | 0.2  |
| 32 | 5  | 51.7  | 48.8-55.2   | 8.88  | GW | 6.10 | <0.001 | x9  | 35273                | 0.0  |
| 33 | 5  | 52.2  | 51.2-54.0   | 4.03  | LG | 5.10 | 0.004  | x8  | 14817                | 0.0  |
| 34 | 5  | 68.2  | 68.1-70.4   | 1.71  | LG | 4.97 | 0.006  | y12 | 43047                | 0.0  |
| 35 | 6  | 16.0  | 15.2-16.3   | 7.54  | GW | 5.30 | <0.001 | y4  | 107600 <sup>ab</sup> | 0.0  |
|    | 6  | 16.0  | 13.5-16.2   | 2.23  | GW | 5.27 | <0.001 | y5  |                      |      |
|    | 6  | 16.0  | 15.2-16.2   | 11.87 | GW | 7.55 | <0.001 | y6  |                      |      |
| 36 | 7  | 8.8   | 8.3-8.9     | 4.50  | LG | 4.58 | 0.003  | x1  | 107557               | 0.00 |
|    | 7  | 8.8   | 8.3-8.9     | 7.23  | LG | 4.99 | 0.002  | x2  |                      |      |
| 37 | 7  | 18.0  | 16.1-19.9   | 2.12  | LG | 4.63 | 0.008  | x11 | 101290               | 0.0  |
| 38 | 8  | 10.0  | 0.0-15.0    | 0.45  | LG | 4.38 | 0.005  | x5  | 93783                | 0.5  |
| 39 | 8  | 10.8  | 0.0-14.0    | 2.21  | LG | 4.24 | 0.006  | y9  | 151762               | 0.0  |
| 40 | 8  | 58.4  | 57.3-60.4   | 14.72 | GW | 6.14 | 0.001  | x11 | 70187 <sup>a</sup>   | 0.0  |
| 41 | 9  | 60.0  | 57.0-63.0   | 10.46 | LG | 4.79 | 0.002  | y15 | 131325 <sup>ab</sup> | 0.22 |
|    | 9  | 61.0  | 57.0-63.8   | 3.85  | LG | 4.60 | 0.005  | y14 |                      | 0.78 |
|    | 9  | 61.0  | 57.8-65.0   | 1.80  | LG | 4.33 | 0.009  | y2  |                      | 0.78 |
| 42 | 9  | 83.9  | 74.0-86.0   | 1.47  | LG | 4.71 | 0.008  | y10 | 23705 <sup>b</sup>   | 0.0  |
|    | 9  | 83.9  | 82.0-87.0   | 5.82  | LG | 4.68 | 0.002  | y11 |                      |      |
| 43 | 10 | 36.4  | 35.2-37.9   | 5.11  | LG | 4.73 | 0.005  | y14 | 64568                | 0.0  |
| 44 | 10 | 37.0  | 35.9-39.3   | 1.43  | GW | 5.52 | 0.001  | y3  | 110970*              | 0.1  |
| 45 | 11 | 34.5  | 31.0-37.0   | 6.29  | LG | 4.32 | 0.003  | y13 | 152398               | 0.0  |
| 46 | 11 | 35.0  | 30.1-37.0   | 7.56  | LG | 4.56 | 0.002  | y9  | 46466                | 0.1  |
| 47 | 11 | 37.9  | 37.2-48.6   | 0.64  | LG | 4.73 | 0.004  | y12 | 42247 <sup>ab</sup>  | 0.0  |
| 48 | 11 | 60.7  | 59.0-64.0   | 8.41  | LG | 5.14 | 0.004  | x13 | 8080                 | 0.00 |
| 49 | 12 | 6.9   | 3.0-8.0     | 7.29  | LG | 4.95 | 0.004  | y10 | 155423 <sup>ab</sup> | 0.0  |
| 50 | 12 | 8.0   | 4.0-12.0    | 1.97  | LG | 4.37 | 0.006  | y7  | 23679                | 0.21 |
|    | 12 | 8.0   | 6.9-12.0    | 1.44  | GW | 5.63 | 0.002  | y8  |                      |      |
| 51 | 12 | 27.1  | 27.0-27.8   | 5.53  | GW | 5.55 | 0.001  | x1  | 132516*              | 0.0  |
| 52 | 12 | 38.2  | 30.5-38.8   | 1.18  | LG | 4.57 | 0.001  | x13 | 69063*               | 0.0  |
| 53 | 12 | 54.9  | 50.7-56.0   | 6.55  | LG | 4.38 | 0.009  | x3  | 893                  | 0.0  |
| 54 | 13 | 20.0  | 18.3-23.0   | 1.18  | LG | 4.40 | 0.008  | y4  | 126101               | 1.1  |
| 55 | 13 | 41.3  | 35.0-45.5   | 6.39  | LG | 5.05 | 0.004  | y13 | 120901               | 0.0  |
| 56 | 13 | 52.0  | 43.7-74.0   | 1.20  | LG | 4.52 | 0.005  | y1  | 38077                | 0.4  |
| 57 | 13 | 54.0  | 52.4-61.0   | 0.42  | GW | 6.31 | <0.001 | y2  | 64843                | 0.0  |
| 58 | 13 | 55.0  | 52.0-60.0   | 5.16  | GW | 7.34 | <0.001 | x4  | 146313 <sup>ab</sup> | 0.8  |

|           |    |      |           |       |    |      |        |     |                       |     |
|-----------|----|------|-----------|-------|----|------|--------|-----|-----------------------|-----|
|           | 13 | 55.8 | 52.0-59.0 | 4.92  | LG | 5.54 | <0.001 | x5  |                       | 0.0 |
| <b>59</b> | 13 | 73.0 | 60.0-87.6 | 2.12  | LG | 3.97 | 0.01   | x2  | 18689                 | 0.2 |
| <b>60</b> | 14 | 11.6 | 9.0-17.0  | 2.63  | LG | 3.91 | 0.008  | y2  | 19673                 | 0.0 |
| <b>61</b> | 14 | 18.2 | 14.7-19.6 | 1.81  | LG | 4.97 | 0.001  | x13 | 123800                | 0.0 |
| <b>62</b> | 15 | 29.9 | 24.2-32.7 | 2.37  | LG | 4.20 | 0.009  | y12 | 107006 <sup>ab</sup>  | 0.0 |
| <b>63</b> | 16 | 10.1 | 0.0-23.0  | 0.79  | LG | 4.86 | 0.001  | y13 | 89546                 | 0.0 |
| <b>64</b> | 16 | 42.0 | 36.0-44.0 | 1.10  | LG | 3.71 | 0.01   | x1  | 49883 <sup>ab</sup>   | 0.3 |
| <b>65</b> | 16 | 46.1 | 42.5-47.0 | 11.81 | LG | 4.24 | 0.003  | y7  | 3271 <sup>ab</sup>    | 0.0 |
|           | 16 | 46.1 | 43.0-47.5 | 10.97 | LG | 4.29 | 0.005  | y8  |                       |     |
|           | 16 | 46.1 | 44.1-47.5 | 4.96  | LG | 4.91 | 0.002  | y1  |                       |     |
| <b>66</b> | 16 | 58.8 | 54.0-64.0 | 1.92  | LG | 4.21 | 0.006  | x9  | 147458                | 0.0 |
| <b>67</b> | 16 | 60.4 | 56.8-66.8 | 2.04  | LG | 3.76 | 0.009  | x8  | 33001*                | 0.0 |
| <b>68</b> | 16 | 63.1 | 57.0-66.8 | 5.85  | LG | 3.84 | 0.01   | x7  | 132794                | 0.0 |
| <b>69</b> | 16 | 78.2 | 68.6-89.0 | 1.26  | LG | 3.90 | 0.004  | y12 | 100560 <sup>ab</sup>  | 0.0 |
| <b>70</b> | 17 | 37.8 | 34.8-42.7 | 8.01  | LG | 4.01 | 0.006  | x12 | 13798                 | 0.0 |
| <b>71</b> | 17 | 44.2 | 43.1-50.1 | 12.42 | LG | 4.99 | <0.001 | x13 | 145673 <sup>b</sup>   | 0.0 |
| <b>72</b> | 17 | 51.5 | 49.3-52.3 | 5.87  | LG | 4.21 | 0.005  | y15 | 123874 <sup>ab</sup>  | 0.0 |
|           | 17 | 51.5 | 48.0-52.3 | 4.76  | LG | 5.60 | 0.001  | y2  |                       |     |
| <b>73</b> | 17 | 51.7 | 48.0-52.9 | 2.59  | LG | 4.56 | 0.002  | y1  | 58078*                | 0.0 |
| <b>74</b> | 17 | 51.8 | 46.0-52.3 | 2.90  | LG | 5.13 | 0.002  | x4  | 74080 <sup>b</sup>    | 0.0 |
| <b>75</b> | 18 | 22.7 | 21.0-24.8 | 6.51  | GW | 7.54 | <0.001 | y3  | 41690                 | 0.0 |
|           | 18 | 23.0 | 18.0-29.0 | 4.72  | LG | 4.28 | 0.005  | y15 |                       | 0.3 |
| <b>76</b> | 19 | 19.0 | 14.0-26.0 | 2.22  | LG | 4.67 | 0.01   | y12 | 9185 <sup>b</sup>     | 0.9 |
| <b>77</b> | 19 | 22.0 | 21.2-24.9 | 7.43  | LG | 4.81 | 0.005  | x12 | 128619                | 0.0 |
| <b>78</b> | 19 | 29.7 | 27.0-31.9 | 3.52  | LG | 4.08 | 0.01   | x13 | 70939                 | 0.0 |
| <b>79</b> | 21 | 61.9 | 49.5-69.9 | 0.97  | LG | 4.01 | 0.009  | y4  | 136924                | 0.0 |
| <b>80</b> | 21 | 72.6 | 71.0-73.5 | 9.54  | LG | 5.88 | <0.001 | y8  | 127803 <sup>ab</sup>  | 0.0 |
| <b>81</b> | 21 | 77.8 | 75.0-82.2 | 3.90  | LG | 4.37 | 0.001  | x12 | 8717 <sup>ab</sup>    | 0.0 |
| <b>82</b> | 21 | 81.0 | 78.0-84.0 | 2.88  | GW | 5.67 | <0.001 | y12 | 107544* <sup>ab</sup> | 0.8 |
| <b>83</b> | 21 | 82.2 | 77.0-86.0 | 10.15 | GW | 5.90 | 0.002  | y10 | 37687*                | 0.0 |
| <b>84</b> | 23 | 2.6  | 2.0-4.0   | 6.38  | LG | 4.31 | 0.005  | x2  | 38781                 | 0.0 |
| <b>85</b> | 23 | 11.0 | 5.0-15.6  | 4.93  | LG | 3.74 | 0.009  | y5  | 29770                 | 1.9 |
| <b>86</b> | 23 | 30.0 | 26.6-32.8 | 2.40  | LG | 4.15 | 0.003  | y6  | 131558 <sup>a</sup>   | 0.2 |
| <b>87</b> | 24 | 54.5 | 53.3-58.5 | 1.12  | LG | 5.14 | 0.002  | x9  | 81546 <sup>ab</sup>   | 0.0 |
| <b>88</b> | 25 | 26.0 | 18.2-30.7 | 14.59 | LG | 4.94 | 0.002  | x7  | 33027                 | 0.6 |
| <b>89</b> | 25 | 29.1 | 28.2-30.0 | 3.77  | LG | 4.76 | 0.005  | x3  | 1790*                 | 0.0 |
| <b>90</b> | 26 | 6.0  | 0.0-10.0  | 2.89  | LG | 3.99 | 0.009  | y6  | 20067                 | 1.2 |
| <b>91</b> | 26 | 36.7 | 36.5-37.9 | 2.43  | GW | 5.40 | <0.001 | x15 | 35278*                | 0.0 |
| <b>92</b> | 26 | 80.0 | 66.0-81.0 | 1.48  | LG | 4.74 | 0.007  | y12 | 65665 <sup>ab</sup>   | 0.9 |
| <b>93</b> | 27 | 0.0  | 0.0-15.0  | 4.32  | LG | 4.55 | 0.004  | y1  | 73904                 | 0.0 |
| <b>94</b> | 27 | 38.9 | 35.6-41.4 | 11.00 | GW | 5.28 | 0.002  | x3  | 80526                 | 0.0 |

|     |    |      |            |       |    |      |        |     |                      |     |
|-----|----|------|------------|-------|----|------|--------|-----|----------------------|-----|
| 95  | 27 | 64.6 | 60.0-64.6  | 4.37  | GW | 5.90 | <0.001 | y10 | 48708                | 0.3 |
|     | 27 | 64.6 | 58.0-64.6  | 5.08  | LG | 4.62 | 0.002  | y11 |                      |     |
| 96  | 28 | 38.0 | 33.0-43.0  | 4.73  | GW | 5.93 | <0.001 | y2  | 88462*               | 0.3 |
|     | 28 | 38.3 | 32.0-42.3  | 3.33  | LG | 4.23 | 0.004  | y7  |                      |     |
|     | 28 | 38.3 | 36.3-39.6  | 3.84  | LG | 4.33 | 0.003  | y8  |                      |     |
|     | 28 | 38.3 | 33.2-39.6  | 1.80  | GW | 6.06 | <0.001 | y1  |                      |     |
| 97  | 29 | 9.0  | 8.0-13.0   | 1.81  | GW | 5.35 | 0.002  | x14 | 12305                | 0.1 |
|     | 29 | 9.1  | 8.00-14.00 | 1.46  | LG | 3.98 | 0.009  | x15 |                      |     |
|     | 29 | 11.0 | 8.0-16.0   | 7.16  | LG | 4.47 | 0.006  | y9  |                      |     |
| 98  | 29 | 17.5 | 16.1-18.1  | 6.12  | LG | 4.30 | 0.004  | x3  | 66525                | 0.0 |
| 99  | 29 | 29.0 | 27.0-30.5  | 5.16  | LG | 5.02 | 0.001  | x9  | 109751               | 0.1 |
| 100 | 29 | 44.0 | 41.2-46.0  | 9.04  | LG | 4.81 | 0.004  | y6  | 41781 <sup>ab</sup>  | 0.2 |
| 101 | 29 | 54.3 | 49.2-56.0  | 3.04  | LG | 4.15 | 0.006  | x4  | 27081                | 0.0 |
| 102 | 31 | 10.8 | 9.0-16.9   | 2.30  | LG | 4.48 | 0.005  | x7  | 101670               | 0.0 |
|     |    |      |            |       |    |      |        |     | *0.0                 |     |
| 103 | 31 | 12.2 | 10.0-13.3  | 7.77  | LG | 4.54 | 0.01   | x14 | 147625               | 0.0 |
|     | 31 | 12.2 | 9.3-16.9   | 8.76  | GW | 5.66 | <0.001 | x5  |                      |     |
| 104 | 31 | 14.9 | 9.3-16.2   | 11.19 | LG | 4.42 | 0.005  | x6  | 3771 <sup>*ab</sup>  | 0.0 |
| 105 | 31 | 16.2 | 11.0-23.0  | 14.35 | LG | 4.89 | 0.002  | y6  | 27954                |     |
| 106 | 31 | 69.0 | 65.6-70.6  | 7.36  | LG | 4.54 | 0.007  | y3  | 69815 <sup>a</sup>   | 0.1 |
|     | 31 | 69.1 | 68.1-71.9  | 12.37 | LG | 5.13 | 0.002  | y14 |                      |     |
| 107 | 32 | 24.4 | 21.0-27.7  | 6.29  | LG | 3.93 | 0.005  | x4  | 125971 <sup>ab</sup> | 0.0 |
|     | 32 | 24.4 | 21.0-31.00 | 2.51  | LG | 3.78 | 0.01   | x5  |                      |     |
| 108 | 32 | 30.0 | 27.0-34.9  | 4.60  | LG | 4.68 | 0.004  | x11 | 97205                | 0.0 |
|     | 32 | 30.0 | 29.2-34.0  | 9.30  | LG | 4.41 | 0.006  | x12 |                      |     |
|     | 32 | 30.0 | 27.0-31.0  | 1.54  | LG | 4.06 | 0.009  | y12 |                      |     |
| 109 | 33 | 47.0 | 44.3-63.0  | 2.67  | LG | 4.28 | 0.009  | x2  | 153833 <sup>ab</sup> | 0.8 |
| 110 | 34 | 6.9  | 6.0-11.4   | 10.18 | LG | 4.13 | <0.001 | x1  | 11005                | 0.0 |
| 111 | 34 | 11.7 | 10.2-13.1  | 7.75  | LG | 3.81 | 0.008  | y13 | 155701 <sup>ab</sup> | 0.0 |
| 112 | 34 | 21.9 | 20.0-22.4  | 3.23  | LG | 4.30 | 0.006  | x15 | 66224                | 0.0 |
| 113 | 34 | 30.0 | 27.3-40.0  | 8.09  | LG | 4.27 | 0.005  | y7  | 81895                | 0.0 |
|     | 34 | 30.0 | 27.7-73.6  | 5.37  | LG | 4.32 | 0.002  | y8  |                      |     |
| 114 | 34 | 36.2 | 33.0-73.6  | 0.47  | LG | 4.43 | 0.006  | y2  | 74955*               | 0.0 |
| 115 | 34 | 41.3 | 34.3-73.6  | 1.34  | LG | 4.15 | 0.006  | y1  | 103362               | 0.0 |
| 116 | 35 | 43.8 | 42.0-44.8  | 0.98  | LG | 4.76 | 0.001  | y13 | 31050 <sup>ab</sup>  | 0.0 |
| 117 | 36 | 6.2  | 2.0-6.9    | 0.51  | LG | 3.87 | 0.008  | y15 | 64089                | 0.0 |
| 118 | 36 | 10.0 | 0.0-14.0   | 3.18  | LG | 4.08 | 0.004  | x14 | 78917                | 1.3 |
| 119 | 36 | 15.4 | 13.0-19.0  | 6.57  | LG | 3.96 | 0.006  | y1  | 9528                 | 0.0 |
|     | 36 | 15.4 | 13.0-17.0  | 2.36  | LG | 3.96 | 0.009  | y2  |                      |     |
| 120 | 36 | 18.9 | 18.1-19.4  | 1.25  | LG | 4.18 | 0.008  | x9  | 45298*               | 0.0 |
| 121 | 36 | 23.5 | 21.9-25.0  | 8.32  | LG | 4.50 | 0.006  | x3  | 114899 <sup>b</sup>  | 0.0 |
| 122 | 36 | 31.4 | 30.5-42.6  | 5.29  | LG | 4.25 | 0.003  | x7  | 60769 <sup>a</sup>   | 0.0 |

|            |    |      |           |       |    |      |        |     |                     |     |
|------------|----|------|-----------|-------|----|------|--------|-----|---------------------|-----|
| <b>123</b> | 37 | 46.9 | 29.4-50.5 | 1.45  | LG | 4.22 | 0.01   | x9  | 60023               | 0.0 |
| <b>124</b> | 37 | 56.0 | 52.4-64.0 | 1.08  | LG | 4.34 | 0.007  | x5  | 136870              | 0.7 |
| <b>125</b> | 37 | 75.3 | 58.1-75.3 | 2.37  | LG | 5.05 | <0.001 | y1  | 28863               | 0.0 |
| <b>126</b> | 38 | 1.0  | 0.0-18.9  | 2.36  | LG | 3.98 | 0.005  | y5  | 138235              | 1.0 |
| <b>127</b> | 38 | 24.9 | 18.8-31.5 | 14.34 | LG | 4.24 | 0.002  | x7  | 8546 <sup>ab</sup>  | 0.0 |
| <b>128</b> | 38 | 30.4 | 27.9-32.0 | 16.43 | GW | 5.69 | <0.001 | x10 | 102431 <sup>b</sup> | 0.0 |
| <b>129</b> | 38 | 42.2 | 37.2-46.0 | 9.56  | GW | 5.46 | <0.001 | y3  | 21462               | 0.0 |
|            | 38 | 42.2 | 41.4-44.0 | 13.03 | GW | 5.68 | <0.001 | y4  |                     |     |
| <b>130</b> | 39 | 2.0  | 0.0-5.8   | 1.55  | LG | 4.35 | 0.005  | x3  | 6501                | 1.5 |
| <b>131</b> | 39 | 9.2  | 5.0-9.7   | 0.98  | LG | 5.15 | 0.001  | x8  | 28896 <sup>ab</sup> | 0.0 |
| <b>132</b> | 39 | 14.0 | 12.1-15.7 | 4.25  | LG | 5.23 | 0.001  | x5  | 67121 <sup>ab</sup> | 0.0 |
| <b>133</b> | 39 | 14.4 | 12.1-15.7 | 0.92  | LG | 4.43 | 0.007  | x7  | 60846 <sup>a</sup>  | 0.0 |
|            | 39 | 14.4 | 12.1-18.0 | 4.13  | LG | 3.76 | 0.009  | x6  |                     |     |
| <b>134</b> | 39 | 15.0 | 11.2-15.7 | 2.15  | LG | 4.63 | 0.004  | x4  | 99974 <sup>b</sup>  | 0.0 |
| <b>135</b> | 39 | 18.8 | 17.0-23.9 | 1.49  | LG | 3.69 | 0.008  | x13 | 86377 <sup>#</sup>  | 0.0 |
| <b>136</b> | 39 | 21.9 | 21.1-22.6 | 0.35  | LG | 4.41 | 0.006  | x9  | 71661 <sup>*</sup>  | 0.0 |
| <b>137</b> | 39 | 26.7 | 23.4-30.0 | 1.13  | LG | 3.98 | 0.007  | y15 | 11245               | 0.0 |
| <b>138</b> | 40 | 11.0 | 2.0-14.6  | 2.15  | LG | 4.66 | 0.002  | x1  | 98245               | 2.1 |

\* The 19 associated SNP that were found to be potentially under divergent selection in at least one lake

# The 13 associated SNP with annotation

<sup>a</sup> The 33 associated SNP that were found to be important markers with RandomForest ran on all five lakes

<sup>b</sup> The 38 associated SNP that were found to be important markers with random forest ran on Cliff, Indian and Webster lakes only.
